# Supplementary material for: Carbon based dot capped silver nanoparticles for efficient surface-enhanced Raman scattering
Source: Royal Society of Chemistry journal article supplement (doi:10.1039/c6tc01943a), 2016-01-01
Supplement: c6tc01943a1.pdf [file c6tc01943a1.pdf]

Supporting Information to

## **Carbon based quantum dots capped silver nanoparticles for efficient surface-enhanced Raman scattering sensing**

Yongqiang Dong\*, Qian Wang, Lisi Wan, Xu You and Yuwu Chi\*

College of Chemistry, Ministry of Education Key Laboratory of Analysis and Detection for Food Safety,  
and Fujian Provincial Key Laboratory of Analysis and Detection for Food Safety, Fuzhou University,  
Fuzhou, 350116, China

E-mail: [y.w.chi@fzu.edu.cn](mailto:y.w.chi@fzu.edu.cn)

The calculation of SERS enhancement factors:

$I_{\text{SERS}}$  of the R6G at the peak of  $1360\text{ cm}^{-1}$  absorbed on the AgNPs@CDs is 3.5 times as large as the  $I_{\text{bulk}}$  of R6G. The spot diameter of a portable Raman spectrometer (BWS415) is  $10\text{ }\mu\text{m}$ , and the spot areal irradiated on the substrate is  $78\text{ }\mu\text{m}^2$ .  $1\text{ nM}$  R6G ( $5\text{ }\mu\text{L}$ ) is added to the substrate, and the areal of the substrate is  $25\text{ mm}^2$ . According to the concentration and volume, the density of distribution of the R6G molecule on the substrate is calculated to be  $2\times 10^{-22}\text{ mol/}\mu\text{m}^2$ , and then multiply spot areal to get the number of the molecules of the excited SERS signal ( $N_{\text{SERS}}=1.57\times 10^{-20}$ ). The density of R6G solid is  $0.79\text{ g/cm}^3$  and the laser penetration depth is about  $2\text{ }\mu\text{m}$ ,<sup>S1</sup> and then  $N_{\text{bulk}}$  could be calculated to be  $2.59\times 10^{-13}$ . According to the formula of EF, the EF of R6G at the peak of  $1360\text{ cm}^{-1}$  absorbed on the AgNPs@CDs is calculated to be  $5.6\times 10^7$ . The the EF of R6G absorbed on the pure AgNPs is calculated to be  $1.7\times 10^7$  by the same way.

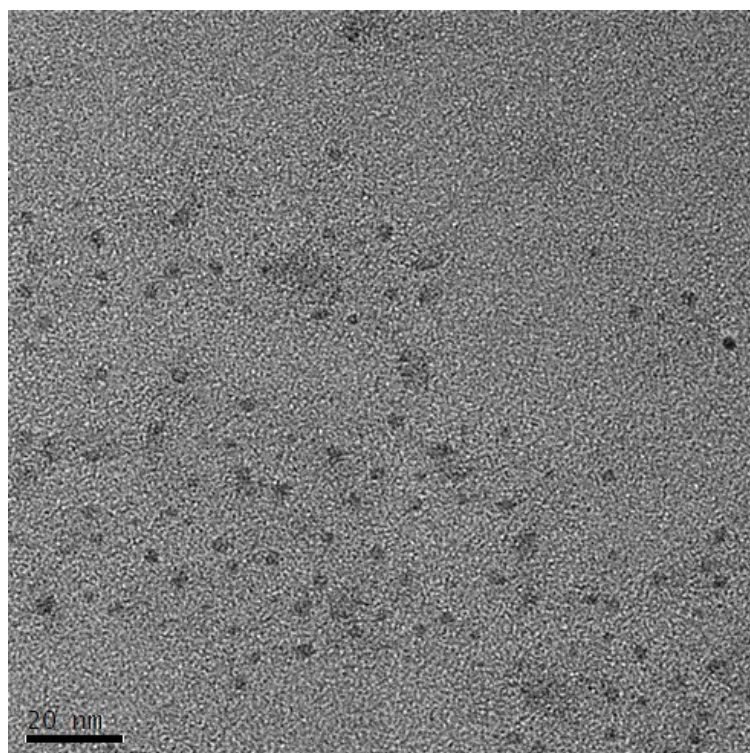

**Fig. S1** TEM image of the used CDs.

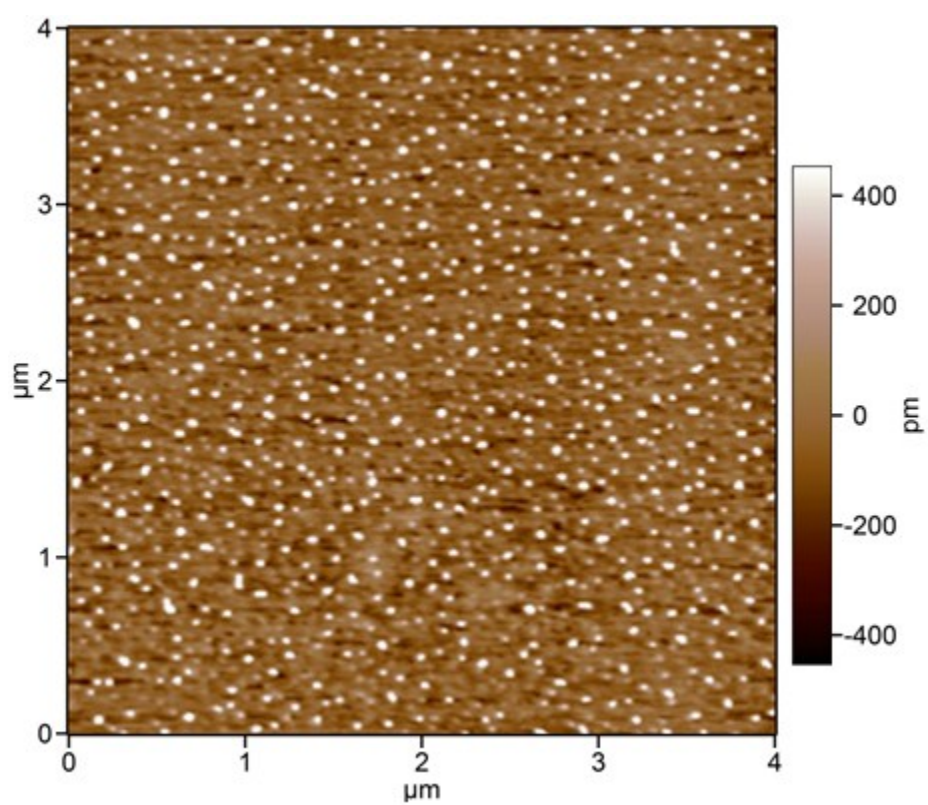

**Fig. S2** AFM image of the used CDs.

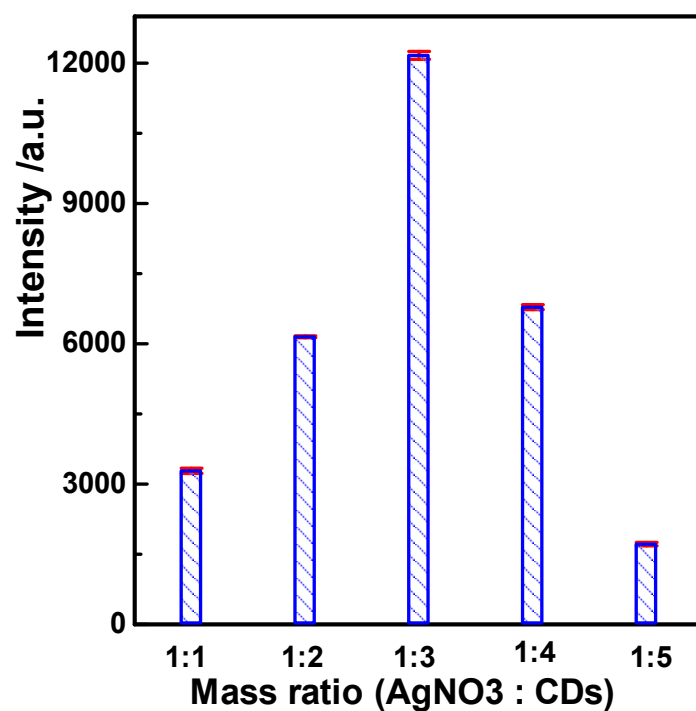

**Fig. S3** Raman peak intensity ( $n = 20$ , confidence level of 99.7%) at  $1361\text{ cm}^{-1}$  of R6G molecules ( $1 \times 10^{-6}\text{ M}$ ) adsorbed on different AgNPs@CDs synthesized at different mass ratio of AgNO<sub>3</sub> to CDs from 1:1 (a), 2:1 (b), 3:1 (c), 4:1 (d) to 5:1 (e).

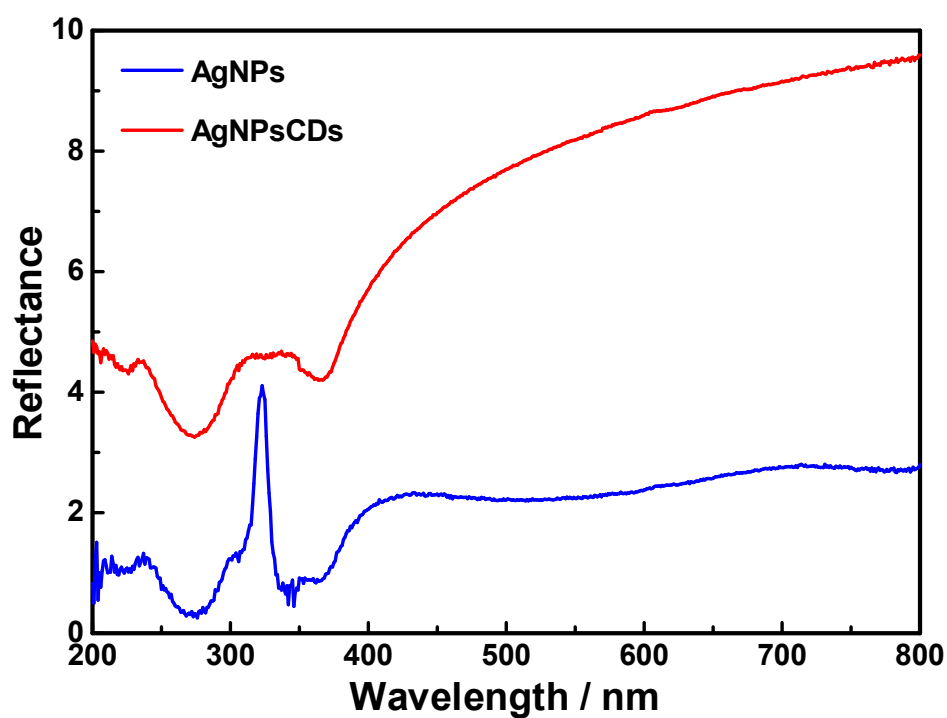

**Fig. S4** Reflectance spectra of AgNPs and AgNPs@CDs.

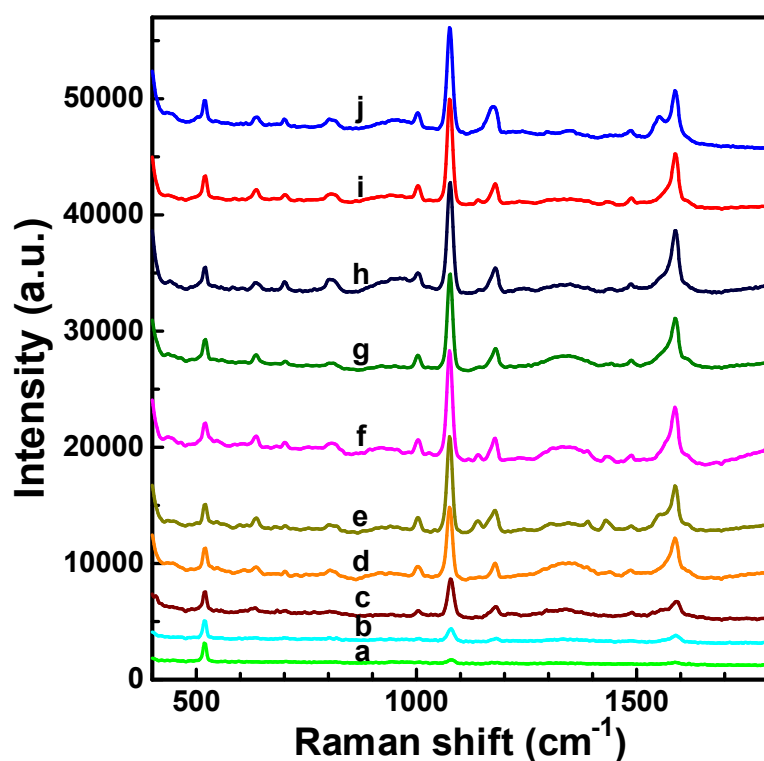

**Fig. S5** Raman spectra of 4-ATP ( $1 \times 10^{-6}$  M) adsorbed on AgNPs@CDs/Si prepared by immersing CTAB modified Si wafer in the AgNPs@CDs solution for 0.5 h (a), 1 h (b), 2 h (c), 3 h (d), 4 h (e), 5 h (f), 6 h (g), 8 h (h), 12 h (i), 24 h (j). The immersed time of AgNPs@CDs/Si in 4-ATP is 6 h.

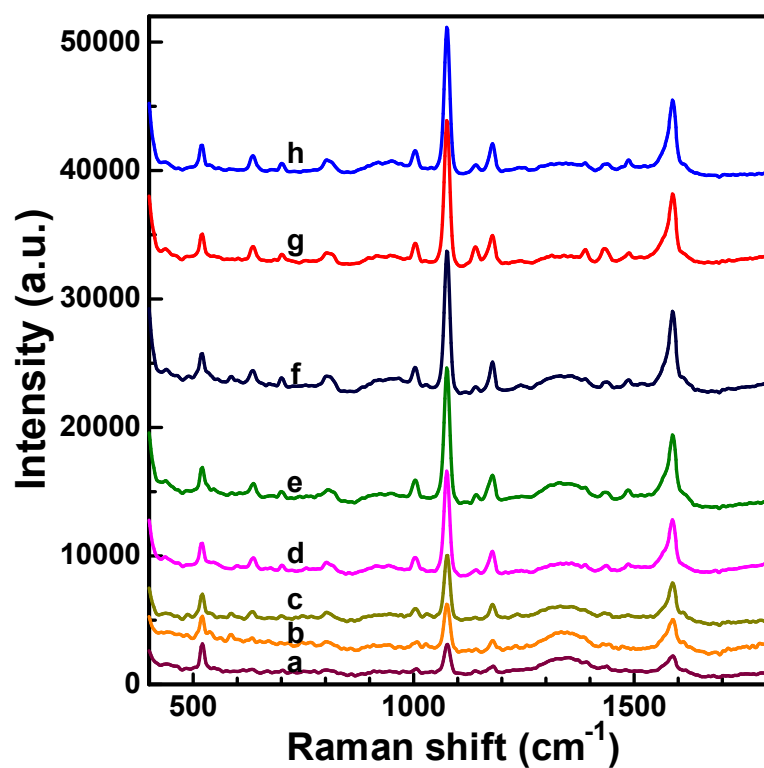

**Fig. S6** Raman spectra of 4-ATP ( $1 \times 10^{-6}$  M) adsorbed on AgNPs@CDs/Si. The immersed times of AgNPs@CDs/Si in 4-ATP solution are 0.5 h (a), 1 h (b), 2 h (c), 3 h (d), 4 h (e), 5 h (f), 6 h (g), 8 h (h). The immersed time of CTAB modified Si wafer in the AgNPs@CDs solution is 5 h.

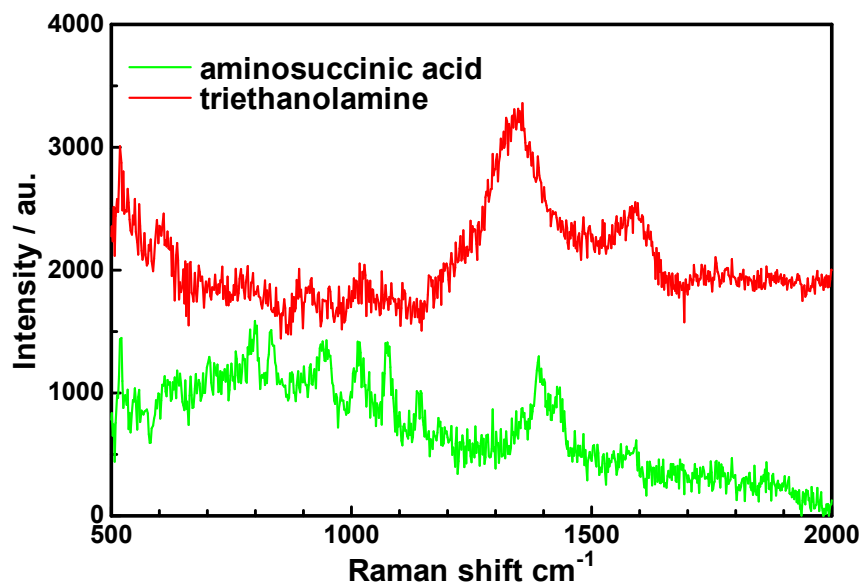

**Fig. S7** Raman spectra of aminosuccinic acid and triethanolamine ( $1 \times 10^{-6}$  M) adsorbed on AgNPs@CDs/Si. The immersed time of AgNPs@CDs/Si in aminosuccinic acid (or triethanolamine) solution is 6 h.

#### Reference

S1. W.-L. Zhai, D.-W. Li, L.-L. Qu, J. S. Fossey and Y.-T. Long, *Nanoscale*, 2012, **4**, 137-142.
